# Supplementary material for: FADD Deficiency Mimicking ALPS-FAS: An Expanding Phenotype.
Source: Research Square preprint supplement (doi:10.21203/rs.3.rs-995974/v1), 2021-10-27
Supplement: Supplementary file 1 [file 480b30c166f5534bfab01d26.docx]

**FADD deficiency mimicking ALPS-FAS: An expanding phenotype.**

Priyanka Setia1, Umair Ahmed Bargir1, Chandrakala S2, Neha Jodhawat1, Priyanka Kambli1, Maya Gupta1, Aparna Dalvi1, Shweta Shinde1, Nayana Nambiar1, Sneha Sawant1 ,Shraddha Shelar1 ,Pallavi Gaikwad1, Amruta Dhawale1, Madhu Mohanty3, Mukesh Agarwal4, Reetika Mallik Yadav1, Manisha Madkaikar1.

1: Indian Council of Medical Research (ICMR)- National Institute of Immunohaematology (NIIH), 13th-floor New multistorey building, KEM Hospital, Parel Mumbai. India

2: Department of Hematology, Seth G.S. Medical College and KEM hospital, Mumbai, India.

3: ICMR-NIV Mumbai unit (ERC), Haffkine institute compound, Parel, Mumbai, India

4: Department of Pediatrics, Seth G.S. Medical College and KEM hospital, Mumbai, India.

**E-mail: madkaikarmanisha@gmail.com**

**Table S3**: **Blood profile and immunological features of P2 at time intervals**

| **Parameter** | **8 year** | **9 year** | **Reference range** |
| --- | --- | --- | --- |
| **White Blood cells** | **34.11× 109/L** | 15.37 × 109/L | 10±5 × 109/L |
| **Red Blood cells** | **6.10 ×1012/L** | 5.51×1012/L | 4.6±0.6 ×1012/L |
| **Haemoglobin** | 14.30 gm/dL | 12.5 gm/dL | 13.5± 2.0gm/dL |
| **Platelets** | **649 × 109/L** | 500× 109/L | 170-450 **×** 109/L |
| **Neutrophils %** | 33% (11.1**×** 109/L) | 37% (5.7**×** 109/L) | 55-70% (2-8 × 109/L) |
| **Eosinophils %** | 0.30% (0.1 **×** 109/L) | 2.5% (0.3 **×** 109/L) | 1- 4% (0.1-1 × 109/L) |
| **Monocytes %** | 10% (3.41 × 109/L) | **8% (1.22× 109/L)** | 2-8%(0.2-1.0× 109/L) |
| **Lymphocytes%** | 57% (19.3 × 109/L) | **51.9% (7.90 ×** 109/L) | 20-40% (1-5 × 109/L) |
| **Absolute lymphocyte count(ALC)** | **19340** count/mm3 | **7977** count/mm3 | 1900-3700 count/mm3 |
| **Basic Immunological evaluation** | | | |
| **T cell % and absolute counts (count/mm3)*** | 66% **(12764)** | **79% (6302)** | 56-75% - (1200-2600) |
| **Th cell % and absolute counts (count/mm3)** | 30% **(5802)** | 32%**( 2553)** | 28-47% (650-1500) |
| **Tc cell % and absolute counts**  **(count/mm3)** | 20% **(3868)** | 28% **(2234)** | 16-30% (370-1100) |
| **B cell % and absolute counts (count/mm3)** | 32% **(6168)** | 18% **(1436)** | 14-33% - (270-860) |
| **NK cell % and absolute counts (count/mm3)** | **2%** (387) | **3%** ( 239) | 4-17% - (100- 480) |
| **Immunoglobulin levels** | | | |
| **IgG** | 8.84 | 8.55 | 4.62-16.82 g/L |
| **IgA** | 1.18 | 0.843 | 0.34-2.74 g/L |
| **IgM** | **0.37** | **0.32** | 0.38-2.51 g/L |
| **IgE** | 17.8 | 17.8 | 0-403 IU/ml |
| **CD4 -T helper cell (Th) cell evaluation** | | | |
| **Th naïve (CD3+CD4+CD45RA+CD27+)** | 75 | 64 | 46-99% |
| **Th central memory (CD3+CD4+CD45RA-CD27+)** | 19.71 | 18 | 0.35-100% |
| **Th effector memory (CD3+CD4+CD45RA-CD27-)** | 2.45 | 12.7 | 0.27- 18% |
| **Th TEMRA (CD3+CD4+CD45RA+CD27-)** | **2.88** | **4.2** | 0.0031-1.8% |
| **T regulatory cells (CD3+CD4+CD25high CD127low)** | **-** | 5 | 3-14% |
| **CD8- Cytotoxic T (Tc) cell evaluation** | | | |
| **Tc naïve (CD3+CD8+CD45RA+CD27+)** | 64 | 35 | 16-100% |
| **Tc central memory (CD3+CD8+CD45RA-CD27+)** | **16.27** | **20.8** | 1-6% |
| **Tc effector memory (CD3+CD8+CD45RA-CD27-)** | 2.99 | 19.7 | 05-100% |
| **Tc TEMRA (CD3+CD8+CD45RA+CD27-)** | 16.96 | 25.8 | 15-41% |
| **B cell evaluation** | | | |
| **B memory**  **(CD19+CD27+)** | **5.05%** | **1.96%** | 7-24.3% |
| **Class switch memory (CD19+CD27+IgM- IgD-)** | 1.46 **%** | **0.98** | 1.1-6.7% |
| **CD21 low B cell**  **(CD19+CD38-CD21low)** | ND | 5.4% | 0.9-7% |
| **Plasma blasts**  **(CD19+ CD27+CD38 high)** | ND | 0.91% | 0.4-3.6% |
| **Transitional B cells** | - | 0.7% | 0.6-3.4% |
| **DNT evaluation** | | | |
| **DNTs** | **19%** | **22%** | <2.5% of total T cells |
| **B220 expression on DNTs** | **37%** | **80%** | <60% |
| **HLADR+ CD45RA+ expression on DNTs** | **22%** | **29%** | <20% |
| **Fas controlled (FC) DNTs** | **-** | **85%** | <30% |
| **Biomarker evaluation** | | | |
| **IL-10 levels** | **-** | 19 pg/ml | <20 pg/ml |
| **Vitamin B12 levels** | **-** | - | <1500 pg/L |
| **IL-18 levels** | - | 321pg/ml | <500 pg/ml |
| **sFASL levels** | **-** | **399 pg/ml** | <200 pg/ml |
| **sIL-2Rα** | **-** | **113509 units/ml** | 1353-45907 units/ml |

ND: Not done
